# Supplementary material
Source: publisher figshare collection journal article supplement (https://gsapubs.figshare.com/ndownloader/files/22399047)
Supplement: Supplementary file 1 [file 22399047]

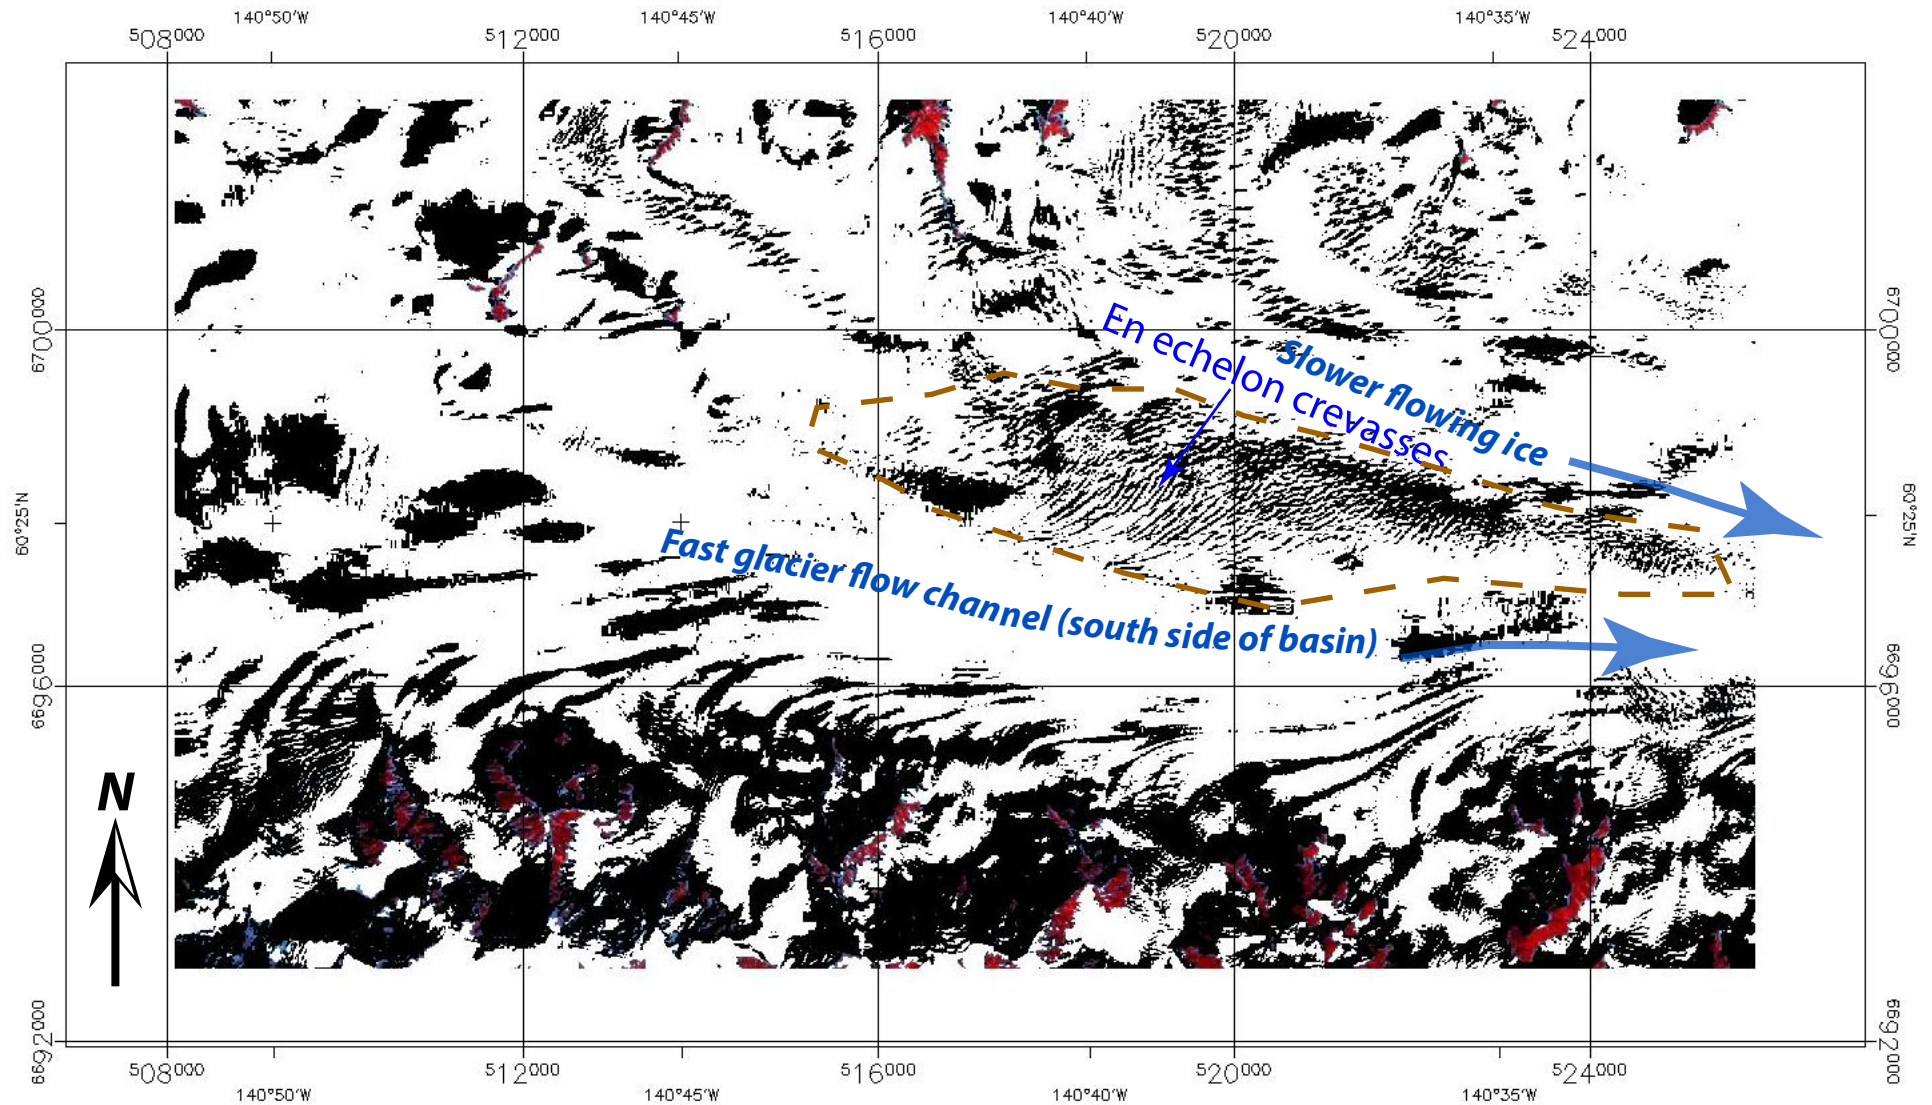

### Legend

- Bedrock outcrops - dark red patches
- Black lines - shaded portions of crevasses
- Black elliptical to polygonal areas - shaded sides of mountains and snow covered moraine bands.
- White areas - snow covered ice
-  Outline of snow and ice covered ridge of bedrock in center of basin
